# Supplementary material for: Regulations and Brain Drain: Evidence from Wall Street Star Analysts’ Career Choices
Source: Atypon-hosted journal article supplement (doi:10.1287/mnsc.2018.3182), 2019-07-03
Supplement: mnsc.2018.3182.sm1.pdf [file mnsc.2018.3182.sm1.pdf]

## Online Appendix

|                                                                                                                                                           |    |
|-----------------------------------------------------------------------------------------------------------------------------------------------------------|----|
| Table OA1. Logistic regressions of analysts who left the sell-side investment research industry including 2002 and 2003.....                              | 1  |
| Table OA2. Logistic regressions of analysts who left the sell-side investment research industry excluding 2006 and 2007 .....                             | 2  |
| Table OA3. Logistic regressions of analysts who left the sell-side investment research industry excluding 1995 to 1997.....                               | 3  |
| Table OA4. Logistic regressions of analysts who left the sell-side investment research industry including 2002 and 2003 but excluding 2006 and 2007 ..... | 4  |
| Table OA5. Logistic regressions of analysts who left the sell-side investment research industry starting from October 2000 .....                          | 5  |
| Table OA6. Logistic regressions of analysts who left the sell-side investment research industry controlling for education ties .....                      | 6  |
| Table OA7. Logistic regressions of analysts who left the sell-side investment research industry with the same set of brokers.....                         | 8  |
| Table OA8. Logistic regressions of analysts who left the sell-side investment research industry controlling for industry revenue and market return .....  | 9  |
| Table OA9. Logistic regressions of analysts who left the sell-side investment research industry and are replaced by a new analyst within one year.....    | 11 |
| Table OA10. Logistic regressions of analysts who left the sell-side investment research industry with alternative definition for leaving year .....       | 12 |
| Table OA11. Logistic regressions of analysts who left the sell-side investment research industry with alternative definition for star analysts .....      | 13 |
| Table OA12. Propensity-score matching .....                                                                                                               | 15 |
| Table OA13. Yearly dummies .....                                                                                                                          | 16 |
| Table OA14. Average number of firms covered per broker and average number of companies followed per analyst.....                                          | 18 |
| Table OA15. The relationship between star analysts' career choices and the investment banking businesses of their core industries.....                    | 19 |
| Table OA 16. Descriptive statistics on the career choice of star analysts who left the sell-side research industry .....                                  | 20 |
| Table OA17. Short-window market responses to earnings revisions and stock recommendations.....                                                            | 21 |
| Table OA18. Industry recommendation.....                                                                                                                  | 22 |

**Table OA1. Logistic regressions of analysts who left the sell-side investment research industry including 2002 and 2003**

*D* is an indicator variable that equals 1 in the post-reform period (January 2002 to December 2007) and 0 in the pre-reform period (January 1995 to December 2001). *STAR* is an indicator variable that equals 1 for analysts on the Institutional Investor All-America Research Team list in a particular year or in at least one of the last two years. *TOPACCU* (*BOTACCU*) is an indicator variable that equals 1 for analysts whose relative forecast accuracy scores are in the top 10% (bottom 10%) and 0 otherwise. Relative forecast accuracy and relative forecast optimism, *RFOPT*, are calculated as described in the text. *EXPERIENCE* is the forecasting experience of an analyst and is defined as the number of years that analyst appears in the I/B/E/S database. *BROKERSIZE* is brokerage firm size, which is calculated as the natural logarithm of the number of analysts employed by the sell-side firm in year *t*. *NFIRM* is the natural logarithm of the number of firms the analyst follows in year *t*. *NIND* is the natural logarithm of the number of two-digit SIC industries that the analyst follows in year *t*. *SANCTIONED* is an indicator variable that equals 1 if the analyst is affiliated with a sanctioned investment bank and 0 otherwise. The sanctioned investment banks include Bear Stearns, Credit Suisse First Boston, Goldman Sachs, Lehman Brothers, J.P. Morgan Securities, Merrill Lynch, Morgan Stanley, Citigroup Global Markets (formerly Salomon Smith Barney), UBS Warburg, U.S. Bancorp Piper Jaffray, Deutsche Bank Securities, and Thomas Weisel Partners. *LOGFEE* is the logarithm of 1 plus the fee proceeds of the investment banking businesses (IPOs and SEOs) of the brokerage firm for which each individual analyst works. *SENTIMENT* is the investor sentiment index of Baker and Wurgler (2006). Standard errors are clustered by securities firm. The *t*-statistics are reported in parentheses beneath the coefficients. \*, \*\*, and \*\*\* denote statistical difference from zero at the 10%, 5%, and 1% levels, respectively, using a two-sided test.

| VARIABLES                        | Dependent Variable: Pr(Left Sell-Side = 1) |                                   |                                  |                                  |
|----------------------------------|--------------------------------------------|-----------------------------------|----------------------------------|----------------------------------|
|                                  | Investment Banks                           |                                   | Non-investment Banks             |                                  |
|                                  | (1)                                        | (2)                               | (3)                              | (4)                              |
| <i>D</i>                         | 0.223***<br>(3.229)                        | 0.277***<br>(3.412)               | -0.059<br>(-0.433)               | 0.102<br>(0.848)                 |
| <i>STAR</i>                      | -0.671***<br>(-7.069)                      | -0.669***<br>(-6.350)             | -0.569***<br>(-3.629)            | -0.557***<br>(-3.492)            |
| <i>D</i> × <i>STAR</i>           | <b>0.721***</b><br><b>(5.028)</b>          | <b>0.762***</b><br><b>(4.565)</b> | <b>-0.186</b><br><b>(-1.350)</b> | <b>-0.196</b><br><b>(-1.467)</b> |
| <i>TOPACCU</i>                   | -0.430***<br>(-7.218)                      | -0.459***<br>(-7.184)             | -0.598***<br>(-4.671)            | -0.604***<br>(-4.710)            |
| <i>BOTACCU</i>                   | -0.378***<br>(-6.471)                      | -0.369***<br>(-5.518)             | -0.207*<br>(-1.928)              | -0.212**<br>(-1.963)             |
| <i>RFOPT</i>                     | -0.033<br>(-0.961)                         | -0.054<br>(-1.387)                | -0.135**<br>(-2.165)             | -0.139**<br>(-2.205)             |
| <i>EXPERIENCE</i>                | -0.014***<br>(-3.630)                      | -0.016***<br>(-3.444)             | -0.020***<br>(-2.749)            | -0.021***<br>(-2.935)            |
| <i>BROKERSIZE</i>                | 0.224***<br>(3.828)                        | 0.184***<br>(3.014)               | 0.181**<br>(2.072)               | 0.180**<br>(2.042)               |
| <i>NIND</i>                      | -0.150**<br>(-2.254)                       | -0.139*<br>(-1.841)               | 0.006<br>(0.050)                 | 0.011<br>(0.088)                 |
| <i>NFIRM</i>                     | -1.077***<br>(-17.576)                     | -1.096***<br>(-16.537)            | -1.038***<br>(-8.801)            | -1.042***<br>(-8.860)            |
| <i>SANCTIONED</i>                | -0.335***<br>(-2.577)                      | -0.381***<br>(-2.789)             |                                  |                                  |
| <i>LOGFEE</i>                    |                                            | 0.010<br>(0.558)                  |                                  |                                  |
| <i>SENTIMENT</i>                 |                                            | 0.116***<br>(2.751)               |                                  | 0.298**<br>(2.399)               |
| <i>Intercept</i>                 | 0.200<br>(0.808)                           | 0.312<br>(1.257)                  | 0.605**<br>(2.472)               | 0.412<br>(1.433)                 |
| <i>N</i>                         | 26,053                                     | 19,772                            | 6,132                            | 6,132                            |
| <i>Pseudo-R</i> <sup>2</sup> (%) | 0.122                                      | 0.125                             | 0.103                            | 0.108                            |
| <i>Area under ROC curve</i>      | 0.751                                      | 0.752                             | 0.729                            | 0.734                            |

**Table OA2. Logistic regressions of analysts who left the sell-side investment research industry excluding 2006 and 2007**

*D* is an indicator variable that equals 1 in the post-reform period (January 2004 to December 2005) and 0 in the pre-reform period (January 1995 to December 2001). *STAR* is an indicator variable that equals 1 for analysts on the Institutional Investor All-America Research Team list in a particular year or in at least one of the last two years. *TOPACCU* (*BOTACCU*) is an indicator variable that equals 1 for analysts whose relative forecast accuracy scores are in the top 10% (bottom 10%) and 0 otherwise. Relative forecast accuracy and relative forecast optimism, *RFOPT*, are calculated as described in the text. *EXPERIENCE* is the forecasting experience of an analyst and is defined as the number of years that analyst appears in the I/B/E/S database. *BROKERSIZE* is brokerage firm size, which is calculated as the natural logarithm of the number of analysts employed by the sell-side firm in year *t*. *NFIRM* is the natural logarithm of the number of firms the analyst follows in year *t*. *NIND* is the natural logarithm of the number of two-digit SIC industries that the analyst follows in year *t*. *SANCTIONED* is an indicator variable that equals 1 if the analyst is affiliated with a sanctioned investment bank and 0 otherwise. The sanctioned investment banks include Bear Stearns, Credit Suisse First Boston, Goldman Sachs, Lehman Brothers, J.P. Morgan Securities, Merrill Lynch, Morgan Stanley, Citigroup Global Markets (formerly Salomon Smith Barney), UBS Warburg, U.S. Bancorp Piper Jaffray, Deutsche Bank Securities, and Thomas Weisel Partners. *LOGFEE* is the logarithm of 1 plus the fee proceeds of the investment banking businesses (IPOs and SEOs) of the brokerage firm for which each individual analyst works. *SENTIMENT* is the investor sentiment index of Baker and Wurgler (2006). Standard errors are clustered by securities firm. The *t*-statistics are reported in parentheses beneath the coefficients. \*, \*\*, and \*\*\* denote statistical difference from zero at the 10%, 5%, and 1% levels, respectively, using a two-sided test.

| VARIABLES                        | Dependent Variable: Pr(Left Sell-Side = 1) |                             |                            |                            |
|----------------------------------|--------------------------------------------|-----------------------------|----------------------------|----------------------------|
|                                  | Investment Banks                           |                             | Non-investment Banks       |                            |
|                                  | (1)                                        | (2)                         | (3)                        | (4)                        |
| <i>D</i>                         | 0.197***<br>(2.633)                        | 0.271***<br>(2.946)         | -0.011<br>(-0.078)         | 0.216*<br>(1.791)          |
| <i>STAR</i>                      | -0.639***<br>(-6.644)                      | -0.636***<br>(-5.937)       | -0.592***<br>(-3.674)      | -0.580***<br>(-3.527)      |
| <b><i>D</i>×<i>STAR</i></b>      | <b>0.606***<br/>(3.748)</b>                | <b>0.687***<br/>(3.523)</b> | <b>-0.190<br/>(-0.762)</b> | <b>-0.196<br/>(-0.835)</b> |
| <i>TOPACCU</i>                   | -0.431***<br>(-5.974)                      | -0.465***<br>(-5.830)       | -0.519***<br>(-3.617)      | -0.525***<br>(-3.642)      |
| <i>BOTACCU</i>                   | -0.400***<br>(-5.927)                      | -0.382***<br>(-4.866)       | -0.166<br>(-1.455)         | -0.166<br>(-1.430)         |
| <i>RFOPT</i>                     | -0.006<br>(-0.180)                         | -0.021<br>(-0.541)          | -0.170**<br>(-2.400)       | -0.172**<br>(-2.398)       |
| <i>EXPERIENCE</i>                | -0.022***<br>(-4.506)                      | -0.021***<br>(-4.027)       | -0.021***<br>(-2.623)      | -0.023***<br>(-2.876)      |
| <i>BROKERSIZE</i>                | 0.265***<br>(4.275)                        | 0.226***<br>(3.572)         | 0.219**<br>(2.164)         | 0.217**<br>(2.111)         |
| <i>NIND</i>                      | -0.176**<br>(-2.103)                       | -0.169*<br>(-1.813)         | 0.128<br>(0.943)           | 0.133<br>(0.974)           |
| <i>NFIRM</i>                     | -1.108***<br>(-17.026)                     | -1.132***<br>(-16.528)      | -1.072***<br>(-8.325)      | -1.072***<br>(-8.342)      |
| <i>SANCTIONED</i>                | -0.373***<br>(-2.784)                      | -0.452***<br>(-3.395)       |                            |                            |
| <i>LOGFEE</i>                    |                                            | 0.013<br>(0.680)            |                            |                            |
| <i>SENTIMENT</i>                 |                                            | 0.111**<br>(2.537)          |                            | 0.328***<br>(2.620)        |
| <i>Intercept</i>                 | 0.220<br>(0.832)                           | 0.315<br>(1.170)            | 0.404<br>(1.566)           | 0.184<br>(0.602)           |
| <i>N</i>                         | 21,758                                     | 16,345                      | 4,922                      | 4,922                      |
| <i>Pseudo-R</i> <sup>2</sup> (%) | 0.135                                      | 0.139                       | 0.101                      | 0.109                      |
| <i>Area under ROC curve</i>      | 0.762                                      | 0.763                       | 0.726                      | 0.734                      |

**Table OA3. Logistic regressions of analysts who left the sell-side investment research industry excluding 1995 to 1997**

*D* is an indicator variable that equals 1 in the post-reform period (January 2004 to December 2007) and 0 in the pre-reform period (January 1998 to December 2001). *STAR* is an indicator variable that equals 1 for analysts on the Institutional Investor All-America Research Team list in a particular year or in at least one of the last two years. *TOPACCU* (*BOTACCU*) is an indicator variable that equals 1 for analysts whose relative forecast accuracy scores are in the top 10% (bottom 10%) and 0 otherwise. Relative forecast accuracy and relative forecast optimism, *RFOPT*, are calculated as described in the text. *EXPERIENCE* is the forecasting experience of an analyst and is defined as the number of years that analyst appears in the I/B/E/S database. *BROKERSIZE* is brokerage firm size, which is calculated as the natural logarithm of the number of analysts employed by the sell-side firm in year *t*. *NFIRM* is the natural logarithm of the number of firms the analyst follows in year *t*. *NIND* is the natural logarithm of the number of two-digit SIC industries that the analyst follows in year *t*. *SANCTIONED* is an indicator variable that equals 1 if the analyst is affiliated with a sanctioned investment bank and 0 otherwise. The sanctioned investment banks include Bear Stearns, Credit Suisse First Boston, Goldman Sachs, Lehman Brothers, J.P. Morgan Securities, Merrill Lynch, Morgan Stanley, Citigroup Global Markets (formerly Salomon Smith Barney), UBS Warburg, U.S. Bancorp Piper Jaffray, Deutsche Bank Securities, and Thomas Weisel Partners. *LOGFEE* is the logarithm of 1 plus the fee proceeds of the investment banking businesses (IPOs and SEOs) of the brokerage firm for which each individual analyst works. *SENTIMENT* is the investor sentiment index of Baker and Wurgler (2006). Standard errors are clustered by securities firm. The *t*-statistics are reported in parentheses beneath the coefficients. \*, \*\*, and \*\*\* denote statistical difference from zero at the 10%, 5%, and 1% levels, respectively, using a two-sided test.

| VARIABLES                        | Dependent Variable: Pr(Left Sell-Side = 1) |                                   |                                     |                                     |
|----------------------------------|--------------------------------------------|-----------------------------------|-------------------------------------|-------------------------------------|
|                                  | Investment Banks                           |                                   | Non-investment Banks                |                                     |
|                                  | (1)                                        | (2)                               | (3)                                 | (4)                                 |
| <i>D</i>                         | 0.017<br>(0.233)                           | 0.090<br>(0.986)                  | -0.266*<br>(-1.810)                 | -0.086<br>(-0.665)                  |
| <i>STAR</i>                      | -0.565***<br>(-4.779)                      | -0.586***<br>(-4.612)             | -0.194<br>(-1.014)                  | -0.191<br>(-1.048)                  |
| <i>D</i> × <i>STAR</i>           | <b>0.848***</b><br><b>(4.823)</b>          | <b>0.907***</b><br><b>(4.304)</b> | <b>-0.593***</b><br><b>(-3.544)</b> | <b>-0.597***</b><br><b>(-3.735)</b> |
| <i>TOPACCU</i>                   | -0.456***<br>(-6.980)                      | -0.448***<br>(-5.977)             | -0.627***<br>(-4.235)               | -0.626***<br>(-4.241)               |
| <i>BOTACCU</i>                   | -0.289***<br>(-4.089)                      | -0.252***<br>(-3.182)             | -0.260**<br>(-2.090)                | -0.268**<br>(-2.139)                |
| <i>RFOPT</i>                     | -0.047<br>(-1.101)                         | -0.070<br>(-1.372)                | -0.181***<br>(-2.577)               | -0.192***<br>(-2.740)               |
| <i>EXPERIENCE</i>                | -0.008*<br>(-1.791)                        | -0.012**<br>(-2.274)              | -0.016*<br>(-1.896)                 | -0.018**<br>(-2.046)                |
| <i>BROKERSIZE</i>                | 0.132**<br>(2.266)                         | 0.086<br>(1.276)                  | 0.170**<br>(2.050)                  | 0.170**<br>(2.004)                  |
| <i>NIND</i>                      | -0.110<br>(-1.406)                         | -0.092<br>(-1.039)                | -0.074<br>(-0.512)                  | -0.060<br>(-0.398)                  |
| <i>NFIRM</i>                     | -1.103***<br>(-15.838)                     | -1.122***<br>(-14.715)            | -1.043***<br>(-8.643)               | -1.054***<br>(-8.648)               |
| <i>SANCTIONED</i>                | -0.301**<br>(-2.222)                       | -0.331**<br>(-2.185)              |                                     |                                     |
| <i>LOGFEE</i>                    |                                            | 0.019<br>(0.877)                  |                                     |                                     |
| <i>SENTIMENT</i>                 |                                            | 0.111***<br>(2.606)               |                                     | 0.294**<br>(2.126)                  |
| <i>Intercept</i>                 | 0.606**<br>(2.389)                         | 0.670***<br>(2.669)               | 0.933***<br>(3.664)                 | 0.735**<br>(2.394)                  |
| <i>N</i>                         | 17,153                                     | 13,438                            | 4,361                               | 4,361                               |
| <i>Pseudo-R</i> <sup>2</sup> (%) | 0.113                                      | 0.118                             | 0.108                               | 0.114                               |
| <i>Area under ROC curve</i>      | 0.741                                      | 0.745                             | 0.732                               | 0.738                               |

**Table OA4. Logistic regressions of analysts who left the sell-side investment research industry including 2002 and 2003 but excluding 2006 and 2007**

*D* is an indicator variable that equals 1 in the post-reform period (January 2002 to December 2005) and 0 in the pre-reform period (January 1995 to December 2001). *STAR* is an indicator variable that equals 1 for analysts on the Institutional Investor All-America Research Team list in a particular year or in at least one of the last two years. *TOPACCU* (*BOTACCU*) is an indicator variable that equals 1 for analysts whose relative forecast accuracy scores are in the top 10% (bottom 10%) and 0 otherwise. Relative forecast accuracy and relative forecast optimism, *RFOPT*, are calculated as described in the text. *EXPERIENCE* is the forecasting experience of an analyst and is defined as the number of years that analyst appears in the I/B/E/S database. *BROKERSIZE* is brokerage firm size, which is calculated as the natural logarithm of the number of analysts employed by the sell-side firm in year *t*. *NFIRM* is the natural logarithm of the number of firms the analyst follows in year *t*. *NIND* is the natural logarithm of the number of two-digit SIC industries that the analyst follows in year *t*. *SANCTIONED* is an indicator variable that equals 1 if the analyst is affiliated with a sanctioned investment bank and 0 otherwise. The sanctioned investment banks include Bear Stearns, Credit Suisse First Boston, Goldman Sachs, Lehman Brothers, J.P. Morgan Securities, Merrill Lynch, Morgan Stanley, Citigroup Global Markets (formerly Salomon Smith Barney), UBS Warburg, U.S. Bancorp Piper Jaffray, Deutsche Bank Securities, and Thomas Weisel Partners. *LOGFEE* is the logarithm of 1 plus the fee proceeds of the investment banking businesses (IPOs and SEOs) of the brokerage firm for which each individual analyst works. *SENTIMENT* is the investor sentiment index of Baker and Wurgler (2006). Standard errors are clustered by securities firm. The *t*-statistics are reported in parentheses beneath the coefficients. \*, \*\*, and \*\*\* denote statistical difference from zero at the 10%, 5%, and 1% levels, respectively, using a two-sided test.

| VARIABLES                        | Dependent Variable: Pr(Left Sell-Side = 1) |                                   |                                  |                                  |
|----------------------------------|--------------------------------------------|-----------------------------------|----------------------------------|----------------------------------|
|                                  | Investment Banks                           |                                   | Non-investment Banks             |                                  |
|                                  | (1)                                        | (2)                               | (3)                              | (4)                              |
| <i>D</i>                         | 0.015<br>(0.177)                           | 0.102<br>(0.852)                  | 0.022<br>(0.144)                 | 0.377**<br>(2.375)               |
| <i>STAR</i>                      | -0.568***<br>(-5.778)                      | -0.563***<br>(-4.985)             | -0.611***<br>(-3.506)            | -0.598***<br>(-3.362)            |
| <i>D</i> × <i>STAR</i>           | <b>0.861***</b><br><b>(3.744)</b>          | <b>0.980***</b><br><b>(3.634)</b> | <b>-0.277</b><br><b>(-1.498)</b> | <b>-0.294</b><br><b>(-1.629)</b> |
| <i>TOPACCU</i>                   | -0.449***<br>(-5.847)                      | -0.433***<br>(-4.663)             | -0.475***<br>(-2.927)            | -0.471***<br>(-2.926)            |
| <i>BOTACCU</i>                   | -0.359***<br>(-4.972)                      | -0.305***<br>(-3.585)             | -0.231*<br>(-1.784)              | -0.235*<br>(-1.789)              |
| <i>RFOPT</i>                     | -0.003<br>(-0.077)                         | -0.034<br>(-0.691)                | -0.242***<br>(-2.963)            | -0.257***<br>(-3.069)            |
| <i>EXPERIENCE</i>                | -0.017***<br>(-3.286)                      | -0.017***<br>(-3.217)             | -0.016*<br>(-1.697)              | -0.018*<br>(-1.948)              |
| <i>BROKERSIZE</i>                | 0.227***<br>(3.580)                        | 0.177***<br>(2.702)               | 0.241**<br>(2.133)               | 0.243**<br>(2.058)               |
| <i>NIND</i>                      | -0.193*<br>(-1.916)                        | -0.184<br>(-1.617)                | 0.052<br>(0.360)                 | 0.077<br>(0.521)                 |
| <i>NFIRM</i>                     | -1.150***<br>(-15.964)                     | -1.172***<br>(-14.908)            | -1.085***<br>(-8.222)            | -1.095***<br>(-8.297)            |
| <i>SANCTIONED</i>                | -0.439***<br>(-3.187)                      | -0.547***<br>(-4.039)             |                                  |                                  |
| <i>LOGFEE</i>                    |                                            | 0.038<br>(1.640)                  |                                  |                                  |
| <i>SENTIMENT</i>                 |                                            | 0.096*<br>(1.888)                 |                                  | 0.403***<br>(2.882)              |
| <i>Intercept</i>                 | 0.443<br>(1.633)                           | 0.466*<br>(1.780)                 | 0.447<br>(1.537)                 | 0.158<br>(0.440)                 |
| <i>N</i>                         | 17,539                                     | 13,109                            | 4,080                            | 4,080                            |
| <i>Pseudo-R</i> <sup>2</sup> (%) | 0.137                                      | 0.141                             | 0.110                            | 0.121                            |
| <i>Area under ROC curve</i>      | 0.765                                      | 0.766                             | 0.736                            | 0.746                            |

**Table OA5. Logistic regressions of analysts who left the sell-side investment research industry starting from October 2000**

*D* is an indicator variable that equals 1 in the post-reform period (January 2004 to December 2007) and 0 in the pre-reform period (October 2000 to December 2001). *STAR* is an indicator variable that equals 1 for analysts on the Institutional Investor All-America Research Team list in a particular year or in at least one of the last two years. *TOPACCU* (*BOTACCU*) is an indicator variable that equals 1 for analysts whose relative forecast accuracy scores are in the top 10% (bottom 10%) and 0 otherwise. Relative forecast accuracy and relative forecast optimism, *RFOPT*, are calculated as described in the text. *EXPERIENCE* is the forecasting experience of an analyst and is defined as the number of years that analyst appears in the I/B/E/S database. *BROKERSIZE* is brokerage firm size, which is calculated as the natural logarithm of the number of analysts employed by the sell-side firm in year *t*. *NFIRM* is the natural logarithm of the number of firms the analyst follows in year *t*. *NIND* is the natural logarithm of the number of two-digit SIC industries that the analyst follows in year *t*. *SANCTIONED* is an indicator variable that equals 1 if the analyst is affiliated with a sanctioned investment bank and 0 otherwise. The sanctioned investment banks include Bear Stearns, Credit Suisse First Boston, Goldman Sachs, Lehman Brothers, J.P. Morgan Securities, Merrill Lynch, Morgan Stanley, Citigroup Global Markets (formerly Salomon Smith Barney), UBS Warburg, U.S. Bancorp Piper Jaffray, Deutsche Bank Securities, and Thomas Weisel Partners. *LOGFEE* is the logarithm of 1 plus the fee proceeds of the investment banking businesses (IPOs and SEOs) of the brokerage firm for which each individual analyst works. *SENTIMENT* is the investor sentiment index of Baker and Wurgler (2006). Standard errors are clustered by securities firm. The *t*-statistics are reported in parentheses beneath the coefficients. \*, \*\*, and \*\*\* denote statistical difference from zero at the 10%, 5%, and 1% levels, respectively, using a two-sided test.

| VARIABLES                        | Dependent Variable: Pr(Left Sell-Side = 1) |                                   |                                |                                 |
|----------------------------------|--------------------------------------------|-----------------------------------|--------------------------------|---------------------------------|
|                                  | Investment Banks                           |                                   | Non-investment Banks           |                                 |
|                                  | (1)                                        | (2)                               | (3)                            | (4)                             |
| <i>D</i>                         | 0.180**<br>(2.063)                         | 0.887***<br>(6.123)               | -0.338<br>(-1.446)             | 0.393**<br>(2.321)              |
| <i>STAR</i>                      | -0.732***<br>(-3.960)                      | -0.662***<br>(-3.488)             | -1.241***<br>(-3.536)          | -1.403***<br>(-3.620)           |
| <i>D</i> × <i>STAR</i>           | <b>0.921***</b><br><b>(3.474)</b>          | <b>0.878***</b><br><b>(2.860)</b> | <b>0.483</b><br><b>(1.524)</b> | <b>0.629*</b><br><b>(1.834)</b> |
| <i>TOPACCU</i>                   | -0.493***<br>(-5.524)                      | -0.477***<br>(-4.584)             | -0.651***<br>(-3.733)          | -0.635***<br>(-3.583)           |
| <i>BOTACCU</i>                   | -0.240**<br>(-2.530)                       | -0.185*<br>(-1.740)               | -0.225<br>(-1.509)             | -0.236<br>(-1.524)              |
| <i>RFOPT</i>                     | -0.052<br>(-0.974)                         | -0.070<br>(-1.117)                | -0.171**<br>(-1.970)           | -0.189**<br>(-2.214)            |
| <i>EXPERIENCE</i>                | -0.008<br>(-1.607)                         | -0.014**<br>(-2.391)              | -0.019**<br>(-1.972)           | -0.021**<br>(-2.079)            |
| <i>BROKERSIZE</i>                | 0.093<br>(1.428)                           | 0.028<br>(0.366)                  | 0.125<br>(1.454)               | 0.125<br>(1.397)                |
| <i>NIND</i>                      | -0.078<br>(-0.859)                         | -0.010<br>(-0.093)                | -0.216<br>(-1.301)             | -0.215<br>(-1.254)              |
| <i>NFIRM</i>                     | -1.004***<br>(-12.701)                     | -1.021***<br>(-11.646)            | -0.933***<br>(-7.111)          | -0.922***<br>(-6.922)           |
| <i>SANCTIONED</i>                | -0.194<br>(-1.320)                         | -0.164<br>(-0.910)                |                                |                                 |
| <i>LOGFEE</i>                    |                                            | 0.012<br>(0.558)                  |                                |                                 |
| <i>SENTIMENT</i>                 |                                            | 0.472***<br>(6.551)               |                                | 0.530***<br>(3.260)             |
| <i>Intercept</i>                 | 0.319<br>(1.116)                           | -0.259<br>(-0.828)                | 1.103***<br>(4.125)            | 0.293<br>(0.753)                |
| <i>N</i>                         | 12,300                                     | 9,812                             | 3,215                          | 3,215                           |
| <i>Pseudo-R</i> <sup>2</sup> (%) | 0.091                                      | 0.107                             | 0.099                          | 0.112                           |
| <i>Area under ROC curve</i>      | 0.722                                      | 0.735                             | 0.722                          | 0.735                           |

**Table OA6. Logistic regressions of analysts who left the sell-side investment research industry controlling for education ties**

*D* is an indicator variable that equals 1 in the post-reform period (January 2004 to December 2007) and 0 in the pre-reform period (January 1995 to December 2001). *STAR* is an indicator variable that equals 1 for analysts on the *Institutional Investor* All-America Research Team list in a particular year or in at least one of the last two years. *TOPACCU* (*BOTACCU*) is an indicator variable that equals 1 for analysts whose relative forecast accuracy scores are in the top 10% (bottom 10%) and 0 otherwise. Relative forecast accuracy and relative forecast optimism, *RFOPT*, are calculated as described in the text. *EXPERIENCE* is the forecasting experience of an analyst and is defined as the number of years that analyst appears in the I/B/E/S database. *BROKERSIZE* is brokerage firm size, which is calculated as the natural logarithm of the number of analysts employed by the sell-side firm in year *t*. *NFIRM* is the natural logarithm of the number of firms the analyst follows in year *t*. *NIND* is the natural logarithm of the number of two-digit SIC industries that the analyst follows in year *t*. *SANCTIONED* is an indicator variable that equals 1 if the analyst is affiliated with a sanctioned investment bank and 0 otherwise. The sanctioned investment banks include Bear Stearns, Credit Suisse First Boston, Goldman Sachs, Lehman Brothers, J.P. Morgan Securities, Merrill Lynch, Morgan Stanley, Citigroup Global Markets (formerly Salomon Smith Barney), UBS Warburg, U.S. Bancorp Piper Jaffray, Deutsche Bank Securities, and Thomas Weisel Partners. *LOGFEE* is the logarithm of 1 plus the fee proceeds of the investment banking businesses (IPOs and SEOs) of the brokerage firm for which each individual analyst works. *SENTIMENT* is the investor sentiment index of Baker and Wurgler (2006). *TIE* is an indicator variable that equals 1 if the analyst has education ties with the top executives or board members of the company that the analyst covers. *RegFD* is an indicator variable that equals 1 in the post-RegFD period (October 2000 to December 2007) and 0 in the pre-RegFD period (January 1995 to September 2000). Standard errors are clustered by securities firm. The *t*-statistics are reported in parentheses beneath the coefficients. \*, \*\*, and \*\*\* denote statistical difference from zero at the 10%, 5%, and 1% levels, respectively, using a two-sided test.

| VARIABLES              | Dependent Variable: Pr(Left Sell-Side = 1) |                                   |                                   |                                   |                                    |                                    |                                     |                                     |
|------------------------|--------------------------------------------|-----------------------------------|-----------------------------------|-----------------------------------|------------------------------------|------------------------------------|-------------------------------------|-------------------------------------|
|                        | (1)                                        | Investment Banks                  |                                   |                                   | (4)                                | Non-investment Banks               |                                     |                                     |
| <i>D</i>               | 0.148**<br>(1.975)                         | 0.212**<br>(2.270)                | -0.142*<br>(-1.694)               | -0.118<br>(-0.982)                | -0.048<br>(-0.335)                 | 0.151<br>(1.164)                   | -0.661***<br>(-3.551)               | -0.571***<br>(-3.475)               |
| <i>STAR</i>            | -0.600***<br>(-6.232)                      | -0.593***<br>(-5.441)             | -0.594***<br>(-6.140)             | -0.582***<br>(-5.248)             | -0.541***<br>(-3.412)              | -0.525***<br>(-3.251)              | -0.418***<br>(-2.832)               | -0.420***<br>(-2.783)               |
| <i>D</i> × <i>STAR</i> | <b>0.896***</b><br><b>(5.447)</b>          | <b>0.928***</b><br><b>(4.855)</b> | <b>0.888***</b><br><b>(5.138)</b> | <b>0.917***</b><br><b>(4.682)</b> | <b>-0.280**</b><br><b>(-2.130)</b> | <b>-0.301**</b><br><b>(-2.203)</b> | <b>-0.388***</b><br><b>(-2.868)</b> | <b>-0.388***</b><br><b>(-2.852)</b> |
| <i>TOPACCU</i>         | -0.444***<br>(-7.341)                      | -0.433***<br>(-6.183)             | -0.440***<br>(-7.349)             | -0.422***<br>(-6.046)             | -0.595***<br>(-4.183)              | -0.600***<br>(-4.227)              | -0.571***<br>(-4.076)               | -0.573***<br>(-4.097)               |
| <i>BOTACCU</i>         | -0.341***<br>(-5.605)                      | -0.305***<br>(-4.296)             | -0.319***<br>(-5.251)             | -0.285***<br>(-3.981)             | -0.268**<br>(-2.272)               | -0.277**<br>(-2.336)               | -0.267**<br>(-2.282)                | -0.269**<br>(-2.307)                |
| <i>RFOPT</i>           | -0.034<br>(-0.872)                         | -0.069<br>(-1.503)                | -0.039<br>(-0.996)                | -0.073<br>(-1.582)                | -0.181***<br>(-2.661)              | -0.193***<br>(-2.793)              | -0.188***<br>(-2.605)               | -0.191***<br>(-2.630)               |
| <i>EXPERIENCE</i>      | -0.008**<br>(-1.972)                       | -0.012**<br>(-2.359)              | -0.010**<br>(-2.265)              | -0.012**<br>(-2.550)              | -0.015*<br>(-1.816)                | -0.016**<br>(-1.991)               | -0.020**<br>(-2.573)                | -0.020**<br>(-2.569)                |
| <i>BROKERSIZE</i>      | 0.192***<br>(3.281)                        | 0.138**<br>(2.150)                | 0.164***<br>(2.929)               | 0.115*<br>(1.846)                 | 0.188**<br>(2.018)                 | 0.188**<br>(1.962)                 | 0.197**<br>(2.104)                  | 0.196**<br>(2.097)                  |
| <i>NIND</i>            | -0.163**                                   | -0.147*                           | -0.123                            | -0.120                            | -0.076                             | -0.061                             | 0.001                               | 0.000                               |

|                                 |                               |                                         |                               |                                      |                             |                             |                              |                              |
|---------------------------------|-------------------------------|-----------------------------------------|-------------------------------|--------------------------------------|-----------------------------|-----------------------------|------------------------------|------------------------------|
| <i>NFIRM</i>                    | (-2.143)<br>-1.088***         | (-1.689)<br>-1.101***                   | (-1.630)<br>-1.093***         | (-1.384)<br>-1.100***                | (-0.559)<br>-1.031***       | (-0.439)<br>-1.040***       | (0.009)<br>-1.059***         | (0.002)<br>-1.059***         |
| <i>SANCTIONED</i>               | (-16.782)<br>-0.392***        | (-15.403)<br>-0.445***                  | (-16.940)<br>-0.358***        | (-15.369)<br>-0.411***               | (-8.659)                    | (-8.750)                    | (-8.803)                     | (-8.804)                     |
| <i>LOGFEE</i>                   | (-2.964)                      | (-3.124)                                | (-2.751)                      | (-2.899)                             |                             |                             |                              |                              |
| <i>SENTIMENT</i>                |                               | 0.027<br>(1.404)<br>0.125***<br>(2.777) |                               | 0.021<br>(1.086)<br>0.004<br>(0.084) |                             | 0.340**<br>(2.476)          |                              | 0.086<br>(0.657)             |
| <b><i>TIE</i></b>               | <b>-0.334***<br/>(-3.890)</b> | <b>-0.310***<br/>(-3.166)</b>           | <b>-1.052***<br/>(-5.235)</b> | <b>-0.772***<br/>(-3.808)</b>        | <b>-0.274*<br/>(-1.661)</b> | <b>-0.299*<br/>(-1.713)</b> | <b>-1.839**<br/>(-2.440)</b> | <b>-1.833**<br/>(-2.435)</b> |
| <b><i>RegFD</i></b>             |                               |                                         | <b>0.439***<br/>(5.590)</b>   | <b>0.430***<br/>(4.119)</b>          |                             |                             | <b>1.033***<br/>(6.260)</b>  | <b>0.966***<br/>(6.136)</b>  |
| <b><i>TIE</i>×<i>RegFD</i></b>  |                               |                                         | <b>0.916***<br/>(3.930)</b>   | <b>0.580**<br/>(2.230)</b>           |                             |                             | <b>1.650**<br/>(2.179)</b>   | <b>1.640**<br/>(2.163)</b>   |
| <i>Intercept</i>                | 0.351<br>(1.425)              | 0.404*<br>(1.710)                       | 0.247<br>(1.020)              | 0.387*<br>(1.656)                    | 0.672**<br>(2.539)          | 0.446<br>(1.389)            | 0.219<br>(0.732)             | 0.192<br>(0.592)             |
| <i>N</i>                        | 21,834                        | 16,536                                  | 21,834                        | 16,536                               | 5,290                       | 5,290                       | 5,290                        | 5,290                        |
| <i>Pseudo-R<sup>2</sup> (%)</i> | 0.122                         | 0.125                                   | 0.127                         | 0.129                                | 0.110                       | 0.117                       | 0.132                        | 0.132                        |
| <i>Area under ROC curve</i>     | 0.753                         | 0.754                                   | 0.757                         | 0.756                                | 0.738                       | 0.744                       | 0.756                        | 0.757                        |

**Table OA7. Logistic regressions of analysts who left the sell-side investment research industry with the same set of brokers**

*D* is an indicator variable that equals 1 in the post-reform period (January 2004 to December 2007) and 0 in the pre-reform period (January 1995 to December 2001). *STAR* is an indicator variable that equals 1 for analysts on the *Institutional Investor* All-America Research Team list in a particular year or in at least one of the last two years. *TOPACCU* (*BOTACCU*) is an indicator variable that equals 1 for analysts whose relative forecast accuracy scores are in the top 10% (bottom 10%) and 0 otherwise. Relative forecast accuracy and relative forecast optimism, *RFOPT*, are calculated as described in the text. *EXPERIENCE* is the forecasting experience of an analyst and is defined as the number of years that analyst appears in the *I/B/E/S* database. *BROKERSIZE* is brokerage firm size, which is calculated as the natural logarithm of the number of analysts employed by the sell-side firm in year *t*. *NFIRM* is the natural logarithm of the number of firms the analyst follows in year *t*. *NIND* is the natural logarithm of the number of two-digit SIC industries that the analyst follows in year *t*. *SANCTIONED* is an indicator variable that equals 1 if the analyst is affiliated with a sanctioned investment bank and 0 otherwise. The sanctioned investment banks include Bear Stearns, Credit Suisse First Boston, Goldman Sachs, Lehman Brothers, J.P. Morgan Securities, Merrill Lynch, Morgan Stanley, Citigroup Global Markets (formerly Salomon Smith Barney), UBS Warburg, U.S. Bancorp Piper Jaffray, Deutsche Bank Securities, and Thomas Weisel Partners. *LOGFEE* is the logarithm of 1 plus the fee proceeds of the investment banking businesses (IPOs and SEOs) of the brokerage firm for which each individual analyst works. *SENTIMENT* is the investor sentiment index of Baker and Wurgler (2006). Standard errors are clustered by securities firm. The *t*-statistics are reported in parentheses beneath the coefficients. \*, \*\*, and \*\*\* denote statistical difference from zero at the 10%, 5%, and 1% levels, respectively, using a two-sided test.

| VARIABLES                        | Dependent Variable: Pr(Left Sell-Side = 1) |                                   |                                  |                                  |
|----------------------------------|--------------------------------------------|-----------------------------------|----------------------------------|----------------------------------|
|                                  | Investment Banks                           |                                   | Non-investment Banks             |                                  |
|                                  | (1)                                        | (2)                               | (3)                              | (4)                              |
| <i>D</i>                         | 0.213**<br>(2.143)                         | 0.279**<br>(2.284)                | -0.176<br>(-0.404)               | -0.236<br>(-0.564)               |
| <i>STAR</i>                      | -0.615***<br>(-6.518)                      | -0.604***<br>(-6.298)             | -0.044<br>(-0.139)               | -0.056<br>(-0.171)               |
| <i>D</i> × <i>STAR</i>           | <b>0.823***</b><br><b>(4.744)</b>          | <b>0.873***</b><br><b>(4.455)</b> | <b>-0.113</b><br><b>(-0.228)</b> | <b>-0.104</b><br><b>(-0.210)</b> |
| <i>TOPACCU</i>                   | -0.536***<br>(-6.611)                      | -0.517***<br>(-5.642)             | -1.412**<br>(-2.511)             | -1.427**<br>(-2.520)             |
| <i>BOTACCU</i>                   | -0.356***<br>(-4.909)                      | -0.304***<br>(-3.461)             | -0.345<br>(-0.910)               | -0.344<br>(-0.910)               |
| <i>RFOPT</i>                     | -0.082*<br>(-1.802)                        | -0.135**<br>(-2.466)              | -0.107<br>(-0.782)               | -0.105<br>(-0.747)               |
| <i>EXPERIENCE</i>                | -0.005<br>(-1.144)                         | -0.011*<br>(-1.893)               | 0.021<br>(1.138)                 | 0.022<br>(1.220)                 |
| <i>BROKERSIZE</i>                | 0.319***<br>(3.032)                        | 0.220**<br>(2.274)                | 0.307<br>(1.289)                 | 0.312<br>(1.283)                 |
| <i>NIND</i>                      | -0.082<br>(-0.801)                         | -0.080<br>(-0.651)                | 0.325<br>(0.800)                 | 0.321<br>(0.790)                 |
| <i>NFIRM</i>                     | -1.113***<br>(-14.845)                     | -1.112***<br>(-13.348)            | -1.557***<br>(-4.716)            | -1.558***<br>(-4.733)            |
| <i>SANCTIONED</i>                | -0.375**<br>(-2.027)                       | -0.359**<br>(-2.016)              |                                  |                                  |
| <i>LOGFEE</i>                    |                                            | 0.002<br>(0.094)                  |                                  |                                  |
| <i>SENTIMENT</i>                 |                                            | 0.115**<br>(2.382)                |                                  | -0.088<br>(-0.826)               |
| <i>Intercept</i>                 | -0.399<br>(-0.929)                         | -0.034<br>(-0.090)                | -0.094<br>(-0.096)               | -0.044<br>(-0.045)               |
| <i>N</i>                         | 15,132                                     | 10,816                            | 1,128                            | 1,128                            |
| <i>Pseudo-R</i> <sup>2</sup> (%) | 0.117                                      | 0.119                             | 0.139                            | 0.140                            |
| <i>Area under ROC curve</i>      | 0.749                                      | 0.748                             | 0.769                            | 0.771                            |

**Table OA8. Logistic regressions of analysts who left the sell-side investment research industry controlling for industry revenue and market return**

*D* is an indicator variable that equals 1 in the post-reform period (January 2004 to December 2007) and 0 in the pre-reform period (January 1995 to December 2001). *STAR* is an indicator variable that equals 1 for analysts on the *Institutional Investor* All-America Research Team list in a particular year or in at least one of the last two years. *TOPACCU* (*BOTACCU*) is an indicator variable that equals 1 for analysts whose relative forecast accuracy scores are in the top 10% (bottom 10%) and 0 otherwise. Relative forecast accuracy and relative forecast optimism, *RFOPT*, are calculated as described in the text. *EXPERIENCE* is the forecasting experience of an analyst and is defined as the number of years that analyst appears in the *I/B/E/S* database. *BROKERSIZE* is brokerage firm size, which is calculated as the natural logarithm of the number of analysts employed by the sell-side firm in year *t*. *NFIRM* is the natural logarithm of the number of firms the analyst follows in year *t*. *NIND* is the natural logarithm of the number of two-digit SIC industries that the analyst follows in year *t*. *SANCTIONED* is an indicator variable that equals 1 if the analyst is affiliated with a sanctioned investment bank and 0 otherwise. The sanctioned investment banks include Bear Stearns, Credit Suisse First Boston, Goldman Sachs, Lehman Brothers, J.P. Morgan Securities, Merrill Lynch, Morgan Stanley, Citigroup Global Markets (formerly Salomon Smith Barney), UBS Warburg, U.S. Bancorp Piper Jaffray, Deutsche Bank Securities, and Thomas Weisel Partners. *LOGFEE* is the logarithm of 1 plus the fee proceeds of the investment banking businesses (IPOs and SEOs) of the brokerage firm for which each individual analyst works. *SENTIMENT* is the investor sentiment index of Baker and Wurgler (2006). Standard errors are clustered by securities firm. The *t*-statistics are reported in parentheses beneath the coefficients. \*, \*\*, and \*\*\* denote statistical difference from zero at the 10%, 5%, and 1% levels, respectively, using a two-sided test.

| VARIABLES              | Dependent Variable: Pr(Left Sell-Side = 1) |                                   |                                   |                                    |
|------------------------|--------------------------------------------|-----------------------------------|-----------------------------------|------------------------------------|
|                        | Investment Banks                           |                                   | Non-investment Banks              |                                    |
|                        | (1)                                        | (2)                               | (3)                               | (4)                                |
| <i>D</i>               | 0.147**<br>(1.968)                         | -0.228*<br>(-1.902)               | -0.063<br>(-0.430)                | -0.531***<br>(-2.933)              |
| <i>STAR</i>            | -0.624***<br>(-6.532)                      | -0.608***<br>(-5.550)             | -0.578***<br>(-3.451)             | -0.512***<br>(-2.952)              |
| <i>D</i> × <i>STAR</i> | <b>0.909***</b><br><b>(5.339)</b>          | <b>0.961***</b><br><b>(4.833)</b> | <b>-0.232*</b><br><b>(-1.742)</b> | <b>-0.322**</b><br><b>(-2.425)</b> |
| <i>TOPACCU</i>         | -0.444***<br>(-7.309)                      | -0.428***<br>(-6.102)             | -0.588***<br>(-4.158)             | -0.582***<br>(-4.121)              |
| <i>BOTACCU</i>         | -0.341***<br>(-5.604)                      | -0.283***<br>(-4.002)             | -0.264**<br>(-2.224)              | -0.271**<br>(-2.277)               |
| <i>RFOPT</i>           | -0.035<br>(-0.906)                         | -0.071<br>(-1.539)                | -0.180***<br>(-2.652)             | -0.195***<br>(-2.783)              |
| <i>EXPERIENCE</i>      | -0.009**<br>(-2.166)                       | -0.013***<br>(-2.723)             | -0.016**<br>(-1.985)              | -0.020**<br>(-2.527)               |
| <i>BROKERSIZE</i>      | 0.189***<br>(3.251)                        | 0.102*<br>(1.674)                 | 0.190**<br>(1.992)                | 0.201**<br>(2.075)                 |
| <i>NIND</i>            | -0.159**<br>(-2.087)                       | -0.112<br>(-1.287)                | -0.074<br>(-0.551)                | -0.021<br>(-0.148)                 |
| <i>NFIRM</i>           | -1.101***<br>(-17.073)                     | -1.115***<br>(-15.444)            | -1.042***<br>(-8.780)             | -1.062***<br>(-8.867)              |
| <i>SANCTIONED</i>      | -0.382***<br>(-2.905)                      | -0.390***<br>(-2.863)             |                                   |                                    |
| <i>LOGFEE</i>          |                                            | 0.019<br>(0.986)                  |                                   |                                    |
| <i>SENTIMENT</i>       |                                            | -0.089<br>(-1.206)                |                                   | -0.016<br>(-0.132)                 |
| <i>TOTREV</i>          |                                            | 0.563***<br>(6.503)               |                                   | 0.795***<br>(3.963)                |
| <i>MKTRET</i>          |                                            | -0.666*<br>(-1.827)               |                                   | -1.208**<br>(-2.071)               |
| <i>Intercept</i>       | 0.359<br>(1.460)                           | -6.342***<br>(-5.923)             | 0.683**<br>(2.554)                | -9.195***<br>(-3.716)              |

|                                 |        |        |       |       |
|---------------------------------|--------|--------|-------|-------|
| <i>N</i>                        | 21,834 | 16,536 | 5,290 | 5,290 |
| <i>Pseudo-R<sup>2</sup> (%)</i> | 0.121  | 0.128  | 0.109 | 0.125 |
| <i>Area under ROC curve</i>     | 0.752  | 0.755  | 0.737 | 0.749 |

---

**Table OA9. Logistic regressions of analysts who left the sell-side investment research industry and are replaced by a new analyst within one year**

*D* is an indicator variable that equals 1 in the post-reform period (January 2004 to December 2007) and 0 in the pre-reform period (January 1995 to December 2001). *STAR* is an indicator variable that equals 1 for analysts on the *Institutional Investor* All-America Research Team list in a particular year or in at least one of the last two years. *TOPACCU* (*BOTACCU*) is an indicator variable that equals 1 for analysts whose relative forecast accuracy scores are in the top 10% (bottom 10%) and 0 otherwise. Relative forecast accuracy and relative forecast optimism, *RFOPT*, are calculated as described in the text. *EXPERIENCE* is the forecasting experience of an analyst and is defined as the number of years that analyst appears in the *I/B/E/S* database. *BROKERSIZE* is brokerage firm size, which is calculated as the natural logarithm of the number of analysts employed by the sell-side firm in year *t*. *NFIRM* is the natural logarithm of the number of firms the analyst follows in year *t*. *NIND* is the natural logarithm of the number of two-digit SIC industries that the analyst follows in year *t*. *SANCTIONED* is an indicator variable that equals 1 if the analyst is affiliated with a sanctioned investment bank and 0 otherwise. The sanctioned investment banks include Bear Stearns, Credit Suisse First Boston, Goldman Sachs, Lehman Brothers, J.P. Morgan Securities, Merrill Lynch, Morgan Stanley, Citigroup Global Markets (formerly Salomon Smith Barney), UBS Warburg, U.S. Bancorp Piper Jaffray, Deutsche Bank Securities, and Thomas Weisel Partners. *LOGFEE* is the logarithm of 1 plus the fee proceeds of the investment banking businesses (IPOs and SEOs) of the brokerage firm for which each individual analyst works. *SENTIMENT* is the investor sentiment index of Baker and Wurgler (2006). Standard errors are clustered by securities firm. The *t*-statistics are reported in parentheses beneath the coefficients. \*, \*\*, and \*\*\* denote statistical difference from zero at the 10%, 5%, and 1% levels, respectively, using a two-sided test.

| VARIABLES                        | Dependent Variable: Pr(Left Sell-Side = 1) |                                   |                                   |                                   |
|----------------------------------|--------------------------------------------|-----------------------------------|-----------------------------------|-----------------------------------|
|                                  | Investment Banks                           |                                   | Non-investment Banks              |                                   |
|                                  | (1)                                        | (2)                               | (3)                               | (4)                               |
| <i>D</i>                         | 1.451***<br>(16.170)                       | 1.684***<br>(14.830)              | 1.109***<br>(4.818)               | 1.366***<br>(4.831)               |
| <i>STAR</i>                      | -0.831***<br>(-6.935)                      | -0.913***<br>(-7.494)             | -1.236***<br>(-4.031)             | -1.233***<br>(-3.872)             |
| <i>D</i> × <i>STAR</i>           | <b>0.793***</b><br><b>(6.017)</b>          | <b>0.993***</b><br><b>(6.763)</b> | <b>-0.545*</b><br><b>(-1.869)</b> | <b>-0.535*</b><br><b>(-1.791)</b> |
| <i>TOPACCU</i>                   | -0.436***<br>(-3.940)                      | -0.337***<br>(-2.775)             | -0.541**<br>(-2.317)              | -0.494**<br>(-2.110)              |
| <i>BOTACCU</i>                   | -0.498***<br>(-4.111)                      | -0.535***<br>(-4.069)             | -0.439*<br>(-1.671)               | -0.447*<br>(-1.662)               |
| <i>RFOPT</i>                     | 0.016<br>(0.307)                           | 0.018<br>(0.294)                  | 0.088<br>(0.586)                  | 0.062<br>(0.417)                  |
| <i>EXPERIENCE</i>                | -0.000<br>(-0.019)                         | -0.001<br>(-0.272)                | 0.003<br>(0.245)                  | 0.002<br>(0.130)                  |
| <i>BROKERSIZE</i>                | 0.287***<br>(4.197)                        | 0.176**<br>(2.270)                | 0.482**<br>(2.521)                | 0.482**<br>(2.404)                |
| <i>NIND</i>                      | -0.016<br>(-0.166)                         | 0.031<br>(0.314)                  | 0.027<br>(0.113)                  | 0.070<br>(0.272)                  |
| <i>NFIRM</i>                     | -1.136***<br>(-16.084)                     | -1.096***<br>(-13.348)            | -1.156***<br>(-5.381)             | -1.147***<br>(-5.267)             |
| <i>SANCTIONED</i>                | -0.472***<br>(-3.822)                      | -0.424***<br>(-3.061)             |                                   |                                   |
| <i>LOGFEE</i>                    |                                            | 0.017<br>(0.745)                  |                                   |                                   |
| <i>SENTIMENT</i>                 |                                            | 0.395***<br>(5.776)               |                                   | 0.347***<br>(2.782)               |
| <i>Intercept</i>                 | 0.306<br>(1.139)                           | 0.229<br>(0.786)                  | 0.328<br>(0.692)                  | 0.016<br>(0.033)                  |
| <i>N</i>                         | 7,349                                      | 5,494                             | 1,099                             | 1,099                             |
| <i>Pseudo-R</i> <sup>2</sup> (%) | 0.172                                      | 0.176                             | 0.155                             | 0.162                             |
| <i>Area under ROC curve</i>      | 0.783                                      | 0.782                             | 0.762                             | 0.765                             |

**Table OA10. Logistic regressions of analysts who left the sell-side investment research industry with alternative definition for leaving year**

*D* is an indicator variable that equals 1 in the post-reform period (January 2004 to December 2007) and 0 in the pre-reform period (January 1995 to December 2001). *STAR* is an indicator variable that equals 1 for analysts on the *Institutional Investor All-America Research Team* list in a particular year or in at least one of the last two years. *TOPACCU* (*BOTACCU*) is an indicator variable that equals 1 for analysts whose relative forecast accuracy scores are in the top 10% (bottom 10%) and 0 otherwise. Relative forecast accuracy and relative forecast optimism, *RFOPT*, are calculated as described in the text. *EXPERIENCE* is the forecasting experience of an analyst and is defined as the number of years that analyst appears in the *I/B/E/S* database. *BROKERSIZE* is brokerage firm size, which is calculated as the natural logarithm of the number of analysts employed by the sell-side firm in year *t*. *NFIRM* is the natural logarithm of the number of firms the analyst follows in year *t*. *NIND* is the natural logarithm of the number of two-digit SIC industries that the analyst follows in year *t*. *SANCTIONED* is an indicator variable that equals 1 if the analyst is affiliated with a sanctioned investment bank and 0 otherwise. The sanctioned investment banks include Bear Stearns, Credit Suisse First Boston, Goldman Sachs, Lehman Brothers, J.P. Morgan Securities, Merrill Lynch, Morgan Stanley, Citigroup Global Markets (formerly Salomon Smith Barney), UBS Warburg, U.S. Bancorp Piper Jaffray, Deutsche Bank Securities, and Thomas Weisel Partners. *LOGFEE* is the logarithm of 1 plus the fee proceeds of the investment banking businesses (IPOs and SEOs) of the brokerage firm for which each individual analyst works. *SENTIMENT* is the investor sentiment index of Baker and Wurgler (2006). Standard errors are clustered by securities firm. The *t*-statistics are reported in parentheses beneath the coefficients. \*, \*\*, and \*\*\* denote statistical difference from zero at the 10%, 5%, and 1% levels, respectively, using a two-sided test.

| VARIABLES                        | Dependent Variable: Pr(Left Sell-Side = 1) |                             |                               |                               |
|----------------------------------|--------------------------------------------|-----------------------------|-------------------------------|-------------------------------|
|                                  | Investment Banks                           |                             | Non-investment Banks          |                               |
|                                  | (1)                                        | (2)                         | (3)                           | (4)                           |
| <i>D</i>                         | 0.280***<br>(3.480)                        | 0.224**<br>(2.425)          | 0.154<br>(1.170)              | 0.107<br>(0.783)              |
| <i>STAR</i>                      | -0.634***<br>(-5.021)                      | -0.658***<br>(-4.249)       | -0.281*<br>(-1.806)           | -0.277*<br>(-1.784)           |
| <b><i>D</i>×<i>STAR</i></b>      | <b>0.849***<br/>(5.783)</b>                | <b>0.884***<br/>(5.029)</b> | <b>-0.464***<br/>(-3.119)</b> | <b>-0.466***<br/>(-3.152)</b> |
| <i>TOPACCU</i>                   | -0.434***<br>(-6.788)                      | -0.454***<br>(-6.589)       | -0.604***<br>(-4.247)         | -0.596***<br>(-4.216)         |
| <i>BOTACCU</i>                   | -0.348***<br>(-6.209)                      | -0.337***<br>(-5.323)       | -0.308**<br>(-2.570)          | -0.301**<br>(-2.517)          |
| <i>RFOPT</i>                     | -0.040<br>(-1.036)                         | -0.065<br>(-1.464)          | -0.173**<br>(-2.561)          | -0.171**<br>(-2.524)          |
| <i>EXPERIENCE</i>                | -0.016***<br>(-3.506)                      | -0.018***<br>(-3.479)       | -0.022***<br>(-2.781)         | -0.022***<br>(-2.789)         |
| <i>BROKERSIZE</i>                | 0.215***<br>(3.535)                        | 0.168***<br>(2.649)         | 0.147**<br>(1.998)            | 0.146**<br>(2.014)            |
| <i>NIND</i>                      | -0.108<br>(-1.577)                         | -0.096<br>(-1.207)          | 0.058<br>(0.439)              | 0.062<br>(0.467)              |
| <i>NFIRM</i>                     | -1.119***<br>(-18.083)                     | -1.133***<br>(-16.462)      | -1.103***<br>(-8.836)         | -1.101***<br>(-8.832)         |
| <i>SANCTIONED</i>                | -0.360**<br>(-2.558)                       | -0.374**<br>(-2.402)        |                               |                               |
| <i>LOGFEE</i>                    |                                            | 0.016<br>(0.804)            |                               |                               |
| <i>SENTIMENT</i>                 |                                            | -0.089<br>(-1.241)          |                               | -0.150<br>(-1.422)            |
| <i>Intercept</i>                 | 0.186<br>(0.759)                           | 0.396<br>(1.587)            | 0.555**<br>(2.430)            | 0.596***<br>(2.626)           |
| <i>N</i>                         | 21,698                                     | 16,390                      | 5,308                         | 5,308                         |
| <i>Pseudo-R</i> <sup>2</sup> (%) | 0.126                                      | 0.129                       | 0.112                         | 0.113                         |
| <i>Area under ROC curve</i>      | 0.756                                      | 0.755                       | 0.742                         | 0.742                         |

**Table OA11. Logistic regressions of analysts who left the sell-side investment research industry with alternative definition for star analysts**

Panel A. Two-year window

*D* is an indicator variable that equals 1 in the post-reform period (January 2004 to December 2007) and 0 in the pre-reform period (January 1995 to December 2001). *STAR* is an indicator variable that equals 1 for analysts on the *Institutional Investor* All-America Research Team list in a particular year or the last year. *TOPACCU* (*BOTACCU*) is an indicator variable that equals 1 for analysts whose relative forecast accuracy scores are in the top 10% (bottom 10%) and 0 otherwise. Relative forecast accuracy and relative forecast optimism, *RFOPT*, are calculated as described in the text. *EXPERIENCE* is the forecasting experience of an analyst and is defined as the number of years that analyst appears in the I/B/E/S database. *BROKERSIZE* is brokerage firm size, which is calculated as the natural logarithm of the number of analysts employed by the sell-side firm in year *t*. *NFIRM* is the natural logarithm of the number of firms the analyst follows in year *t*. *NIND* is the natural logarithm of the number of two-digit SIC industries that the analyst follows in year *t*. *SANCTIONED* is an indicator variable that equals 1 if the analyst is affiliated with a sanctioned investment bank and 0 otherwise. The sanctioned investment banks include Bear Stearns, Credit Suisse First Boston, Goldman Sachs, Lehman Brothers, J.P. Morgan Securities, Merrill Lynch, Morgan Stanley, Citigroup Global Markets (formerly Salomon Smith Barney), UBS Warburg, U.S. Bancorp Piper Jaffray, Deutsche Bank Securities, and Thomas Weisel Partners. *LOGFEE* is the logarithm of 1 plus the fee proceeds of the investment banking businesses (IPOs and SEOs) of the brokerage firm for which each individual analyst works. *SENTIMENT* is the investor sentiment index of Baker and Wurgler (2006). Standard errors are clustered by securities firm. The *t*-statistics are reported in parentheses beneath the coefficients. \*, \*\*, and \*\*\* denote statistical difference from zero at the 10%, 5%, and 1% levels, respectively, using a two-sided test.

| VARIABLES                        | Dependent Variable: Pr(Left Sell-Side = 1) |                                   |                                  |                                  |
|----------------------------------|--------------------------------------------|-----------------------------------|----------------------------------|----------------------------------|
|                                  | Investment Banks                           |                                   | Non-investment Banks             |                                  |
|                                  | (1)                                        | (2)                               | (3)                              | (4)                              |
| <i>D</i>                         | 0.173**<br>(2.353)                         | 0.227**<br>(2.417)                | -0.067<br>(-0.461)               | 0.129<br>(0.982)                 |
| <i>STAR</i>                      | -0.925***<br>(-8.550)                      | -0.951***<br>(-7.272)             | -0.705***<br>(-3.391)            | -0.664***<br>(-3.004)            |
| <i>D</i> × <i>STAR</i>           | <b>0.839***</b><br><b>(4.184)</b>          | <b>0.936***</b><br><b>(3.573)</b> | <b>-0.097</b><br><b>(-0.660)</b> | <b>-0.149</b><br><b>(-0.929)</b> |
| <i>TOPACCU</i>                   | -0.447***<br>(-7.350)                      | -0.439***<br>(-6.256)             | -0.587***<br>(-4.146)            | -0.590***<br>(-4.186)            |
| <i>BOTACCU</i>                   | -0.346***<br>(-5.725)                      | -0.311***<br>(-4.420)             | -0.263**<br>(-2.215)             | -0.271**<br>(-2.271)             |
| <i>RFOPT</i>                     | -0.036<br>(-0.915)                         | -0.070<br>(-1.525)                | -0.180***<br>(-2.649)            | -0.192***<br>(-2.775)            |
| <i>EXPERIENCE</i>                | -0.008*<br>(-1.856)                        | -0.011**<br>(-2.258)              | -0.017**<br>(-2.020)             | -0.018**<br>(-2.208)             |
| <i>BROKERSIZE</i>                | 0.191***<br>(3.298)                        | 0.138**<br>(2.174)                | 0.187**<br>(1.964)               | 0.186*<br>(1.911)                |
| <i>NIND</i>                      | -0.158**<br>(-2.072)                       | -0.140<br>(-1.599)                | -0.068<br>(-0.503)               | -0.053<br>(-0.383)               |
| <i>NFIRM</i>                     | -1.089***<br>(-16.983)                     | -1.103***<br>(-15.665)            | -1.045***<br>(-8.798)            | -1.054***<br>(-8.890)            |
| <i>SANCTIONED</i>                | -0.358***<br>(-2.742)                      | -0.406***<br>(-2.915)             |                                  |                                  |
| <i>LOGFEE</i>                    |                                            | 0.028<br>(1.450)                  |                                  |                                  |
| <i>SENTIMENT</i>                 |                                            | 0.120***<br>(2.666)               |                                  | 0.335**<br>(2.463)               |
| <i>Intercept</i>                 | 0.310<br>(1.261)                           | 0.360<br>(1.529)                  | 0.687**<br>(2.568)               | 0.464<br>(1.434)                 |
| <i>N</i>                         | 21,834                                     | 16,536                            | 5,290                            | 5,290                            |
| <i>Pseudo-R</i> <sup>2</sup> (%) | 0.121                                      | 0.124                             | 0.109                            | 0.116                            |
| <i>Area under ROC curve</i>      | 0.753                                      | 0.753                             | 0.737                            | 0.742                            |

Table OA11 (cont).

## Panel B. One-year window

$D$  is an indicator variable that equals 1 in the post-reform period (January 2004 to December 2007) and 0 in the pre-reform period (January 1995 to December 2001).  $STAR$  is an indicator variable that equals 1 for analysts on the *Institutional Investor* All-America Research Team list in the last year.  $TOPACCU$  ( $BOTACCU$ ) is an indicator variable that equals 1 for analysts whose relative forecast accuracy scores are in the top 10% (bottom 10%) and 0 otherwise. Relative forecast accuracy and relative forecast optimism,  $RFOPT$ , are calculated as described in the text.  $EXPERIENCE$  is the forecasting experience of an analyst and is defined as the number of years that analyst appears in the I/B/E/S database.  $BROKERSIZE$  is brokerage firm size, which is calculated as the natural logarithm of the number of analysts employed by the sell-side firm in year  $t$ .  $NFIRM$  is the natural logarithm of the number of firms the analyst follows in year  $t$ .  $NIND$  is the natural logarithm of the number of two-digit SIC industries that the analyst follows in year  $t$ .  $SANCTIONED$  is an indicator variable that equals 1 if the analyst is affiliated with a sanctioned investment bank and 0 otherwise. The sanctioned investment banks include Bear Stearns, Credit Suisse First Boston, Goldman Sachs, Lehman Brothers, J.P. Morgan Securities, Merrill Lynch, Morgan Stanley, Citigroup Global Markets (formerly Salomon Smith Barney), UBS Warburg, U.S. Bancorp Piper Jaffray, Deutsche Bank Securities, and Thomas Weisel Partners.  $LOGFEE$  is the logarithm of 1 plus the fee proceeds of the investment banking businesses (IPOs and SEOs) of the brokerage firm for which each individual analyst works.  $SENTIMENT$  is the investor sentiment index of Baker and Wurgler (2006). Standard errors are clustered by securities firm. The  $t$ -statistics are reported in parentheses beneath the coefficients. \*, \*\*, and \*\*\* denote statistical difference from zero at the 10%, 5%, and 1% levels, respectively, using a two-sided test.

| VARIABLES                        | Dependent Variable: Pr(Left Sell-Side = 1) |                                   |                                  |                                   |
|----------------------------------|--------------------------------------------|-----------------------------------|----------------------------------|-----------------------------------|
|                                  | Investment Banks                           |                                   | Non-investment Banks             |                                   |
|                                  | (1)                                        | (2)                               | (3)                              | (4)                               |
| $D$                              | 0.191**<br>(2.539)                         | 0.251***<br>(2.631)               | -0.069<br>(-0.471)               | 0.127<br>(0.973)                  |
| $STAR$                           | -0.359***<br>(-3.115)                      | -0.337**<br>(-2.395)              | -0.237<br>(-0.758)               | -0.163<br>(-0.482)                |
| $D \times STAR$                  | <b>0.967***</b><br><b>(5.085)</b>          | <b>0.979***</b><br><b>(4.398)</b> | <b>-0.685</b><br><b>(-1.640)</b> | <b>-0.776*</b><br><b>(-1.719)</b> |
| $TOPACCU$                        | -0.439***<br>(-7.265)                      | -0.428***<br>(-6.075)             | -0.583***<br>(-4.122)            | -0.586***<br>(-4.165)             |
| $BOTACCU$                        | -0.335***<br>(-5.511)                      | -0.300***<br>(-4.221)             | -0.258**<br>(-2.165)             | -0.267**<br>(-2.221)              |
| $RFOPT$                          | -0.039<br>(-0.992)                         | -0.075<br>(-1.587)                | -0.184***<br>(-2.674)            | -0.195***<br>(-2.800)             |
| $EXPERIENCE$                     | -0.010**<br>(-2.394)                       | -0.013***<br>(-2.650)             | -0.017**<br>(-2.051)             | -0.018**<br>(-2.238)              |
| $BROKERSIZE$                     | 0.183***<br>(3.143)                        | 0.130**<br>(2.052)                | 0.176*<br>(1.813)                | 0.175*<br>(1.767)                 |
| $NIND$                           | -0.155**<br>(-2.024)                       | -0.142<br>(-1.614)                | -0.059<br>(-0.430)               | -0.044<br>(-0.312)                |
| $NFIRM$                          | -1.115***<br>(-17.213)                     | -1.127***<br>(-15.927)            | -1.048***<br>(-8.811)            | -1.058***<br>(-8.905)             |
| $SANCTIONED$                     | -0.406***<br>(-3.121)                      | -0.453***<br>(-3.305)             |                                  |                                   |
| $LOGFEE$                         |                                            | 0.027<br>(1.384)                  |                                  |                                   |
| $SENTIMENT$                      |                                            | 0.122***<br>(2.723)               |                                  | 0.336**<br>(2.467)                |
| <i>Intercept</i>                 | 0.385<br>(1.563)                           | 0.438*<br>(1.866)                 | 0.698***<br>(2.597)              | 0.474<br>(1.461)                  |
| $N$                              | 21,834                                     | 16,536                            | 5,290                            | 5,290                             |
| <i>Pseudo-R</i> <sup>2</sup> (%) | 0.119                                      | 0.123                             | 0.108                            | 0.115                             |
| <i>Area under ROC curve</i>      | 0.751                                      | 0.751                             | 0.735                            | 0.741                             |

### Table OA12. Propensity-score matching

*D* is an indicator variable that equals 1 in the post-reform period (January 2004 to December 2007) and 0 in the pre-reform period (January 1995 to December 2001). *STAR* is an indicator variable that equals 1 for analysts on the *Institutional Investor* All-America Research Team list in a particular year or in at least one of the last two years. *TOPACCU* (*BOTACCU*) is an indicator variable that equals 1 for analysts whose relative forecast accuracy scores are in the top 10% (bottom 10%) and 0 otherwise. Relative forecast accuracy and relative forecast optimism, *RFOPT*, are calculated as described in the text. *EXPERIENCE* is the forecasting experience of an analyst and is defined as the number of years that analyst appears in the *I/B/E/S* database. *BROKERSIZE* is brokerage firm size, which is calculated as the natural logarithm of the number of analysts employed by the sell-side firm in year *t*. *NFIRM* is the natural logarithm of the number of firms the analyst follows in year *t*. *NIND* is the natural logarithm of the number of two-digit SIC industries that the analyst follows in year *t*. *SANCTIONED* is an indicator variable that equals 1 if the analyst is affiliated with a sanctioned investment bank and 0 otherwise. The sanctioned investment banks include Bear Stearns, Credit Suisse First Boston, Goldman Sachs, Lehman Brothers, J.P. Morgan Securities, Merrill Lynch, Morgan Stanley, Citigroup Global Markets (formerly Salomon Smith Barney), UBS Warburg, U.S. Bancorp Piper Jaffray, Deutsche Bank Securities, and Thomas Weisel Partners. *LOGFEE* is the logarithm of 1 plus the fee proceeds of the investment banking businesses (IPOs and SEOs) of the brokerage firm for which each individual analyst works. *SENTIMENT* is the investor sentiment index of Baker and Wurgler (2006). Standard errors are clustered by securities firm. The *t*-statistics are reported in parentheses beneath the coefficients. \*, \*\*, and \*\*\* denote statistical difference from zero at the 10%, 5%, and 1% levels, respectively, using a two-sided test.

| Dependent Variable: Pr(Left Sell-Side = 1)<br>Investment Banks |                                   |
|----------------------------------------------------------------|-----------------------------------|
| <i>D</i>                                                       | 0.650***<br>(3.539)               |
| <i>STAR</i>                                                    | -0.438***<br>(-3.132)             |
| <b><i>D</i>×<i>STAR</i></b>                                    | <b>0.498***</b><br><b>(2.842)</b> |
| <i>TOPACCU</i>                                                 | -0.337<br>(-1.384)                |
| <i>BOTACCU</i>                                                 | -0.142<br>(-0.450)                |
| <i>RFOPT</i>                                                   | -0.209*<br>(-1.890)               |
| <i>EXPERIENCE</i>                                              | 0.012<br>(0.864)                  |
| <i>BROKERSIZE</i>                                              | -0.277<br>(-1.130)                |
| <i>NIND</i>                                                    | -0.023<br>(-0.189)                |
| <i>NFIRM</i>                                                   | -1.384***<br>(-10.872)            |
| <i>SANCTIONED</i>                                              | -0.004<br>(-0.015)                |
| <i>LOGFEE</i>                                                  | -0.007<br>(-0.356)                |
| <i>SENTIMENT</i>                                               | 0.078<br>(0.762)                  |
| <i>Intercept</i>                                               | 2.211**<br>(2.332)                |
| <i>N</i>                                                       | 4,248                             |
| <i>Pseudo-R</i> <sup>2</sup> (%)                               | 0.0971                            |
| <i>Area under ROC curve</i>                                    | 0.738                             |

**Table OA13. Yearly dummies**

*D2002* is an indicator variable that equals 1 in 2002 and 0 otherwise. *D2003* is an indicator variable that equals 1 in 2003 and 0 otherwise. *D2004* is an indicator variable that equals 1 in 2004 and 0 otherwise. *D2005* is an indicator variable that equals 1 in 2005 and 0 otherwise. *D2006* is an indicator variable that equals 1 in 2006 and 0 otherwise. *D2007* is an indicator variable that equals 1 in 2007 and 0 otherwise. *STAR* is an indicator variable that equals 1 for analysts on the *Institutional Investor* All-America Research Team list in a particular year or in at least one of the last two years. *TOPACCU* (*BOTACCU*) is an indicator variable that equals 1 for analysts whose relative forecast accuracy scores are in the top 10% (bottom 10%) and 0 otherwise. Relative forecast accuracy and relative forecast optimism, *RFOPT*, are calculated as described in the text. *EXPERIENCE* is the forecasting experience of an analyst and is defined as the number of years that analyst appears in the I/B/E/S database. *BROKERSIZE* is brokerage firm size, which is calculated as the natural logarithm of the number of analysts employed by the sell-side firm in year *t*. *NFIRM* is the natural logarithm of the number of firms the analyst follows in year *t*. *NIND* is the natural logarithm of the number of two-digit SIC industries that the analyst follows in year *t*. *SANCTIONED* is an indicator variable that equals 1 if the analyst is affiliated with a sanctioned investment bank and 0 otherwise. The sanctioned investment banks include Bear Stearns, Credit Suisse First Boston, Goldman Sachs, Lehman Brothers, J.P. Morgan Securities, Merrill Lynch, Morgan Stanley, Citigroup Global Markets (formerly Salomon Smith Barney), UBS Warburg, U.S. Bancorp Piper Jaffray, Deutsche Bank Securities, and Thomas Weisel Partners. *LOGFEE* is the logarithm of 1 plus the fee proceeds of the investment banking businesses (IPOs and SEOs) of the brokerage firm for which each individual analyst works. *SENTIMENT* is the investor sentiment index of Baker and Wurgler (2006). Standard errors are clustered by securities firm. The *t*-statistics are reported in parentheses beneath the coefficients. \*, \*\*, and \*\*\* denote statistical difference from zero at the 10%, 5%, and 1% levels, respectively, using a two-sided test.

| VARIABLES                  | Dependent Variable: Pr(Left Sell-Side = 1) |                       |                       |                       |
|----------------------------|--------------------------------------------|-----------------------|-----------------------|-----------------------|
|                            | Investment Banks                           |                       | Non-investment Banks  |                       |
|                            | (1)                                        | (2)                   | (3)                   | (4)                   |
| <i>STAR</i>                | -0.669***<br>(-7.053)                      | -0.667***<br>(-6.324) | -0.572***<br>(-3.659) | -0.555***<br>(-3.400) |
| <i>D2002</i>               | 0.405***<br>(4.257)                        | 0.403***<br>(3.743)   | -0.024<br>(-0.111)    | -0.116<br>(-0.513)    |
| <i>D2002</i> × <i>STAR</i> | 0.203<br>(1.029)                           | 0.292<br>(1.380)      | 0.133<br>(0.316)      | 0.119<br>(0.299)      |
| <i>D2003</i>               | 0.314***<br>(2.817)                        | 0.420***<br>(2.900)   | -0.144<br>(-0.776)    | 0.340*<br>(1.763)     |
| <i>D2003</i> × <i>STAR</i> | 0.600***<br>(3.247)                        | 0.658***<br>(2.759)   | -0.308<br>(-0.452)    | -0.316<br>(-0.465)    |
| <i>D2004</i>               | -0.027<br>(-0.246)                         | 0.112<br>(0.670)      | -0.010<br>(-0.054)    | 0.585**<br>(2.570)    |
| <i>D2004</i> × <i>STAR</i> | 1.010***<br>(3.235)                        | 1.137***<br>(3.015)   | -0.312<br>(-0.583)    | -0.319<br>(-0.623)    |
| <i>D2005</i>               | 0.055<br>(0.574)                           | 0.109<br>(0.985)      | 0.040<br>(0.233)      | 0.271*<br>(1.657)     |
| <i>D2005</i> × <i>STAR</i> | 0.608**<br>(2.472)                         | 0.637**<br>(2.098)    | -0.220<br>(-1.018)    | -0.227<br>(-0.973)    |
| <i>D2006</i>               | 0.143<br>(1.458)                           | 0.191<br>(1.584)      | -0.071<br>(-0.389)    | 0.100<br>(0.575)      |
| <i>D2006</i> × <i>STAR</i> | 1.072***<br>(4.431)                        | 1.134***<br>(3.970)   | 0.156<br>(0.504)      | 0.147<br>(0.450)      |
| <i>D2007</i>               | 0.371***<br>(3.380)                        | 0.327***<br>(3.156)   | -0.179<br>(-0.958)    | -0.087<br>(-0.494)    |
| <i>D2007</i> × <i>STAR</i> | 0.938***<br>(3.020)                        | 0.784**<br>(2.063)    | -0.887***<br>(-4.440) | -0.896***<br>(-4.218) |
| <i>TOPACCU</i>             | -0.426***<br>(-7.157)                      | -0.451***<br>(-7.033) | -0.597***<br>(-4.666) | -0.593***<br>(-4.708) |
| <i>BOTACCU</i>             | -0.378***                                  | -0.369***             | -0.206*               | -0.209*               |

|                                 |           |           |           |           |
|---------------------------------|-----------|-----------|-----------|-----------|
|                                 | (-6.325)  | (-5.398)  | (-1.915)  | (-1.926)  |
| <i>RFOPT</i>                    | -0.025    | -0.048    | -0.131**  | -0.141**  |
|                                 | (-0.747)  | (-1.240)  | (-2.089)  | (-2.192)  |
| <i>EXPERIENCE</i>               | -0.014*** | -0.016*** | -0.020*** | -0.022*** |
|                                 | (-3.624)  | (-3.407)  | (-2.742)  | (-2.974)  |
| <i>BROKERSIZE</i>               | 0.218***  | 0.180***  | 0.183**   | 0.181**   |
|                                 | (3.739)   | (2.942)   | (2.097)   | (2.037)   |
| <i>NIND</i>                     | -0.156**  | -0.144*   | 0.005     | 0.029     |
|                                 | (-2.338)  | (-1.916)  | (0.045)   | (0.227)   |
| <i>NFIRM</i>                    | -1.074*** | -1.093*** | -1.036*** | -1.044*** |
|                                 | (-17.375) | (-16.321) | (-8.769)  | (-8.887)  |
| <i>SANCTIONED</i>               | -0.327**  | -0.376*** |           |           |
|                                 | (-2.533)  | (-2.757)  |           |           |
| <i>LOGFEE</i>                   |           | 0.010     |           |           |
|                                 |           | (0.551)   |           |           |
| <i>SENTIMENT</i>                |           | 0.097*    |           | 0.442***  |
|                                 |           | (1.765)   |           | (3.006)   |
| <i>Intercept</i>                | 0.224     | 0.338     | 0.595**   | 0.281     |
|                                 | (0.907)   | (1.351)   | (2.442)   | (0.918)   |
| <i>N</i>                        | 26,053    | 19,772    | 6,132     | 6,132     |
| <i>Pseudo-R<sup>2</sup> (%)</i> | 0.124     | 0.126     | 0.103     | 0.111     |
| <i>Area under ROC curve</i>     | 0.753     | 0.753     | 0.730     | 0.737     |

**Table OA14. Average number of firms covered per broker and average number of companies followed per analyst**

Panel A. Main sample

| year | Average number of firms covered per broker |                    | Number of companies followed per analyst |                    |
|------|--------------------------------------------|--------------------|------------------------------------------|--------------------|
| 1995 | 559.0                                      |                    | 20.9                                     |                    |
| 1996 | 596.3                                      |                    | 20.7                                     |                    |
| 1997 | 639.2                                      |                    | 19.5                                     |                    |
| 1998 | 687.2                                      |                    | 19.5                                     |                    |
| 1999 | 720.7                                      |                    | 19.0                                     |                    |
| 2000 | 706.3                                      | Average 1995-2001: | 17.4                                     | Average 1995-2001: |
| 2001 | 728.8                                      | 662.5              | 15.7                                     | 19.0               |
| 2002 | 736.0                                      |                    | 15.7                                     |                    |
| 2003 | 643.1                                      | Average 2002-2007: | 20.3                                     | Average 2002-2007: |
| 2004 | 648.1                                      | 699.1              | 16.3                                     | 17.3               |
| 2005 | 686.5                                      |                    | 17.0                                     |                    |
| 2006 | 722.2                                      | Average 2004-2007: | 17.2                                     | Average 2004-2007: |
| 2007 | 758.5                                      | 703.8              | 17.6                                     | 17.0               |

Panel B. A sample with same set of brokers

| year | Average number of firms covered per broker |                    | Number of companies followed per analyst |                    |
|------|--------------------------------------------|--------------------|------------------------------------------|--------------------|
| 1995 | 636.7                                      |                    | 21.0                                     |                    |
| 1996 | 680.9                                      |                    | 20.7                                     |                    |
| 1997 | 743.7                                      |                    | 20.0                                     |                    |
| 1998 | 794.1                                      |                    | 19.4                                     |                    |
| 1999 | 844.7                                      |                    | 18.8                                     |                    |
| 2000 | 845.5                                      | Average 1995-2001: | 17.9                                     | Average 1995-2001: |
| 2001 | 863.5                                      | 772.7              | 15.9                                     | 19.1               |
| 2002 | 836.5                                      |                    | 15.8                                     |                    |
| 2003 | 732.3                                      | Average 2002-2007: | 21.6                                     | Average 2002-2007: |
| 2004 | 737.4                                      | 791.7              | 16.4                                     | 17.7               |
| 2005 | 779.8                                      |                    | 17.1                                     |                    |
| 2006 | 810.2                                      | Average 2004-2007: | 17.5                                     | Average 2004-2007: |
| 2007 | 853.8                                      | 795.3              | 17.8                                     | 17.2               |

**Table OA15. The relationship between star analysts' career choices and the investment banking businesses of their core industries**

This table presents the number and percentage of star analysts who left the sell-side equity research industry for the quartiles classified based on the total proceeds of IPOs and SEOs. Panel A classifies the star analysts into quartiles based on the total proceeds of the IPOs and SEOs of their core industries. Panel B classifies the core industries into quartiles based on the total proceeds of IPOs and SEOs and assigns the star analysts to each quartile accordingly. The pre-reform period covers 1995-2001. **The post-reform period is 2002-2007.**

|                                                                                                                                     | Industry<br>Quartile | Mean Total<br>Proceeds (million<br>dollars) | Number of<br>Star<br>Analysts | Number of<br>Departing Star<br>Analysts | Percentage of<br>Departing Star<br>Analysts |
|-------------------------------------------------------------------------------------------------------------------------------------|----------------------|---------------------------------------------|-------------------------------|-----------------------------------------|---------------------------------------------|
| <i>Panel A. Classify the star analysts into quartiles based on the total proceeds of the IPOs and SEOs of their core industries</i> |                      |                                             |                               |                                         |                                             |
| Pre-reform period<br>1995-2001                                                                                                      | 4                    | 22,478                                      | 1,006                         | 54                                      | 5.37%                                       |
|                                                                                                                                     | 3                    | 4,120                                       | 556                           | 25                                      | 4.50%                                       |
|                                                                                                                                     | 2                    | 1,102                                       | 270                           | 8                                       | 2.96%                                       |
|                                                                                                                                     | 1                    | 233                                         | 240                           | 9                                       | 3.75%                                       |
| Post-reform period<br>2002-2007                                                                                                     | 4                    | 21,573                                      | 1183                          | 151                                     | 12.76%                                      |
|                                                                                                                                     | 3                    | 4,985                                       | 393                           | 43                                      | 10.94%                                      |
|                                                                                                                                     | 2                    | 1,684                                       | 318                           | 34                                      | 10.69%                                      |
|                                                                                                                                     | 1                    | 495                                         | 236                           | 17                                      | 7.20%                                       |

*Panel B. Classify the core industries into quartiles based on the total proceeds of IPOs and SEOs*

|                                 |   |        |     |    |        |
|---------------------------------|---|--------|-----|----|--------|
| Pre-reform period<br>1995-2001  | 4 | 32,809 | 418 | 17 | 4.07%  |
|                                 | 3 | 14,912 | 582 | 34 | 5.84%  |
|                                 | 2 | 4,640  | 522 | 27 | 5.17%  |
|                                 | 1 | 803    | 550 | 18 | 3.27%  |
| Post-reform period<br>2002-2007 | 4 | 33,251 | 429 | 67 | 15.62% |
|                                 | 3 | 16,845 | 576 | 70 | 12.15% |
|                                 | 2 | 6,289  | 551 | 57 | 10.34% |
|                                 | 1 | 1,220  | 574 | 51 | 8.89%  |

**Table OA 16. Descriptive statistics on the career choice of star analysts who left the sell-side research industry**

We identify the star analysts who left the sell-side research profession from 1995 through 2007 and classify their career choices into one of eight categories: (A) Promoted to a managerial position within the firm or at another firm; (B) Transferred laterally to a different department within the firm; (C) Moved to a buy-side, hedge fund, private equity, or venture capital firm; (D) Started own investment research firm or moved to another research firm that is not covered by the I/B/E/S; (E) Moved to a non-financial industry; (F) Retired or fired for causes; (G) Still a sell-side analyst but not found in the I/B/E/S; and (H) Not enough information to classify. We first use Nelson's Directory of Investment Research to verify that the analysts have left sell-side research and to check whether they have been promoted to a managerial position in investment research. Next, we search Factiva and Google to identify the first job these analysts took after they left the sell-side research industry. To compute the t-statistics, we estimate the standard error using the standard deviation of the percent changes across these eight categories, assuming that the percent changes from these eight categories are drawn from a normal distribution with zero mean. The pre-reform period covers 1995-2001 (columns 1 and 2). **The post-reform period is 2002-2007** (columns 3 and 4).

| Category                             | Pre-reform Period<br>1995 to 2001 |            | Post-reform Period<br>2002 to 2007 |            | Difference |        |
|--------------------------------------|-----------------------------------|------------|------------------------------------|------------|------------|--------|
|                                      | # who left                        | % who left | # who left                         | % who left | (4) to (2) | t-stat |
|                                      | (1)                               | (2)        | (3)                                | (4)        | (5)        | (6)    |
| <i>Panel A. Investment banks</i>     |                                   |            |                                    |            |            |        |
| A. Promoted                          | 19                                | 17.6       | 44                                 | 16.7       | -0.9       | -0.7   |
| B. Transferred                       | 7                                 | 6.5        | 20                                 | 7.6        | 1.1        | 0.8    |
| C. Moved to buy side                 | 26                                | 24.1       | 85                                 | 32.3       | 8.2        | 6.1    |
| D. To another firm                   | 5                                 | 4.6        | 8                                  | 3.0        | -1.6       | -1.2   |
| E. To a non-financial industry       | 16                                | 14.8       | 40                                 | 15.2       | 0.4        | 0.3    |
| F. Retired or fired                  | 9                                 | 8.3        | 23                                 | 8.7        | 0.4        | 0.3    |
| G. Not in the I/B/E/S                | 6                                 | 5.6        | 6                                  | 2.3        | -3.3       | -2.4   |
| H. Lack information                  | 20                                | 18.5       | 37                                 | 14.1       | -4.4       | -3.2   |
| Total                                | 108                               | 100.0      | 263                                | 100.0      |            |        |
| <i>Panel B. Non-investment banks</i> |                                   |            |                                    |            |            |        |
| A. Promoted                          | 3                                 | 30.0       | 2                                  | 13.3       | -16.7      | -4.5   |
| B. Transferred                       | 0                                 | 0.0        | 1                                  | 6.7        | 6.7        | 1.8    |
| C. Moved to buy side                 | 5                                 | 50.0       | 7                                  | 46.7       | -3.3       | -0.9   |
| D. To another firm                   | 0                                 | 0.0        | 1                                  | 6.7        | 6.7        | 1.8    |
| E. To a non-financial industry       | 0                                 | 0.0        | 2                                  | 13.3       | 13.3       | 3.6    |
| F. Retired or fired                  | 0                                 | 0.0        | 1                                  | 6.7        | 6.7        | 1.8    |
| G. Not in the I/B/E/S                | 0                                 | 0.0        | 0                                  | 0.0        | 0.0        | 0.0    |
| H. Lack information                  | 2                                 | 20.0       | 1                                  | 6.7        | -13.3      | -3.6   |
| Total                                | 10                                | 100.0      | 15                                 | 100.0      |            |        |

**Table OA17. Short-window market responses to earnings revisions and stock recommendations**

Table OA17 presents the market responses to revisions of annual earnings forecasts and changes in stock recommendations of departed star analysts and a group of benchmark analyst. It includes departed star analysts and other star analysts who followed the same companies in the year prior to the star analysts leaving sell-side equity research.  $CAR(-1,+1)$  is the market-adjusted abnormal returns from day  $-1$  to day  $+1$ , where day 0 is the date when the analysts revise their earnings forecasts (recommendations). *Revision* is earnings forecast revision deflating by last forecast made by the same analyst for the same firm and fiscal year. *RecREV* is the I/B/E/S stock recommendation changes made by the same analyst for the same firm. *DESTAR* is an indicator variable that equals 1 for departed star analyst. *SIZE* is the logarithm of 1 plus firm's total asset. *BM* is firm's book-to-market. *EXPERIENCE* is the forecasting experience of an analyst and is defined as the number of years that analyst appears in the I/B/E/S database. *FIRMEXP* is firm-specific experience, which is defined as the number of years in which the analyst has issued at least one earnings forecast for firm  $i$  before year  $t$ . *BROKERSIZE* is brokerage firm size, which is calculated as the natural logarithm of the number of analysts employed by the sell-side firm in year  $t$ . *NFIRM* is number of firms the analyst follows in year  $t$ . *NIND* is number of two-digit SIC industries that the analyst follows in year  $t$ . The  $t$ -statistics are reported in parentheses. \*, \*\*, and \*\*\* denote statistical significance at the 10%, 5%, and 1% levels, respectively.

| VARIABLES                  | Dependent Variable: $CAR(-1,+1)$ |                       |
|----------------------------|----------------------------------|-----------------------|
|                            | REV=Revision<br>(1)              | REV=RecREV<br>(2)     |
| <i>REV</i>                 | 2.159***<br>(20.828)             | 2.332***<br>(27.191)  |
| <i>DESTAR</i>              | 0.141***<br>(2.867)              | 0.596***<br>(4.047)   |
| <i>DESTAR</i> × <i>REV</i> | 0.401**<br>(2.319)               | -0.169<br>(-1.331)    |
| <i>SIZE</i>                | 0.083***<br>(5.703)              | 0.200***<br>(4.308)   |
| <i>BM</i>                  | -0.075**<br>(-2.515)             | 0.375***<br>(3.111)   |
| <i>EXPERIENCE</i>          | 0.095**<br>(1.976)               | -0.237<br>(-1.513)    |
| <i>FIRMEXP</i>             | 0.016***<br>(3.177)              | 0.008<br>(0.507)      |
| <i>BROKERSIZE</i>          | -0.005<br>(-0.813)               | 0.019<br>(0.965)      |
| <i>NFIRM</i>               | 0.113<br>(1.547)                 | 0.650***<br>(2.922)   |
| <i>NIND</i>                | -0.130*<br>(-1.737)              | 0.091<br>(0.397)      |
| <i>Intercept</i>           | -1.622***<br>(-5.063)            | -3.663***<br>(-3.634) |
| <i>N</i>                   | 78,210                           | 8,174                 |
| <i>Adj R</i> <sup>2</sup>  | 0.011                            | 0.140                 |

**Table OA18. Industry recommendation**

Panel A. Logistic regressions of analysts who issue industry recommendation

*DESTAR* is an indicator variable that equals 1 for departed star analyst. *SIZE* is logarithm of 1 plus firm's total asset. *BM* is firm's book-to-market. *EXPERIENCE* is the forecasting experience of an analyst and is defined as the number of years that analyst appears in the I/B/E/S database. *FIRMEXP* is firm-specific experience, which is defined as the number of years in which the analyst has issued at least one earnings forecast for firm *i* before year *t*. *BROKERSIZE* is brokerage firm size, which is calculated as the natural logarithm of the number of analysts employed by the sell-side firm in year *t*. *NFIRM* is number of firms the analyst follows in year *t*. *NIND* is number of two-digit SIC industries that the analyst follows in year *t*. The *t*-statistics are reported in parentheses. \*, \*\*, and \*\*\* denote statistical significance at the 10%, 5%, and 1% levels, respectively.

| VARIABLES                 | Issuing Industry Recommendation<br>(1) |
|---------------------------|----------------------------------------|
| <i>DESTAR</i>             | 0.237***<br>(7.272)                    |
| <i>SIZE</i>               | 0.090***<br>(10.781)                   |
| <i>BM</i>                 | -0.012<br>(-0.656)                     |
| <i>EXPERIENCE</i>         | 0.016***<br>(5.410)                    |
| <i>FIRMEXP</i>            | -0.003<br>(-0.813)                     |
| <i>BROKERSIZE</i>         | 1.141***<br>(49.667)                   |
| <i>NFIRM</i>              | 0.827***<br>(26.250)                   |
| <i>NIND</i>               | -0.107**<br>(-2.576)                   |
| <i>Intercept</i>          | -9.400***<br>(-62.802)                 |
| <i>N</i>                  | 38,535                                 |
| <i>Adj R</i> <sup>2</sup> | 0.166                                  |

Table OA 18. (cont.)

## Panel B. Short-window market responses to industry recommendations

Table OA16 Panel B presents the market responses to industry recommendations of departed star analysts and other analysts who followed the same companies in the year prior to the star analysts leaving sell-side equity research.  $CAR(-1,+1)$  is the market-adjusted abnormal returns from day  $-1$  to day  $+1$ , where day  $0$  is the date when the analysts make their industry recommendations.  $REC$  is I/B/E/S industry recommendation made by the same analyst.  $DESTAR$  is an indicator variable that equals 1 for departed star analyst.  $SIZE$  is logarithm of 1 plus firm's total asset.  $BM$  is firm's book-to-market.  $EXPERIENCE$  is the forecasting experience of an analyst and is defined as the number of years that analyst appears in the I/B/E/S database.  $FIRMEXP$  is firm-specific experience, which is defined as the number of years in which the analyst has issued at least one earnings forecast for firm  $i$  before year  $t$ .  $BROKERSIZE$  is brokerage firm size, which is calculated as the natural logarithm of the number of analysts employed by the sell-side firm in year  $t$ .  $NFIRM$  is number of firms the analyst follows in year  $t$ .  $NIND$  is number of two-digit SIC industries that the analyst follows in year  $t$ . The  $t$ -statistics are reported in parentheses. \*, \*\*, and \*\*\* denote statistical significance at the 10%, 5%, and 1% levels, respectively.

| VARIABLES                  | CAR(-1,+1)<br>(1)     |
|----------------------------|-----------------------|
| <i>DESTAR</i>              | 0.206*<br>(1.949)     |
| <i>REC</i>                 | -0.013<br>(-0.577)    |
| <i>DESTAR</i> × <i>REC</i> | 0.069*<br>(1.896)     |
| <i>SIZE</i>                | -0.042***<br>(-4.337) |
| <i>BM</i>                  | -0.022<br>(-0.559)    |
| <i>EXPERIENCE</i>          | -0.047**<br>(-2.287)  |
| <i>FIRMEXP</i>             | 0.001<br>(0.426)      |
| <i>BROKERSIZE</i>          | 0.007<br>(1.313)      |
| <i>NFIRM</i>               | 0.131***<br>(3.168)   |
| <i>NIND</i>                | -0.114**<br>(-2.366)  |
| <i>Intercept</i>           | 0.408***<br>(3.448)   |
| <i>N</i>                   | 6,984                 |
| <i>Adj R<sup>2</sup></i>   | 0.004                 |
